# Supplementary material for: RAB31 marks and controls an ESCRT-independent exosome pathway
Source: PubMed Central journal article supplement (PMC8027411; doi:10.1038/s41422-020-00409-1), 2020-09-21
Supplement: 41422_2020_409_MOESM1_ESM.pdf [file 41422_2020_409_MOESM1_ESM.pdf]

# Supplementary information, Fig. S1

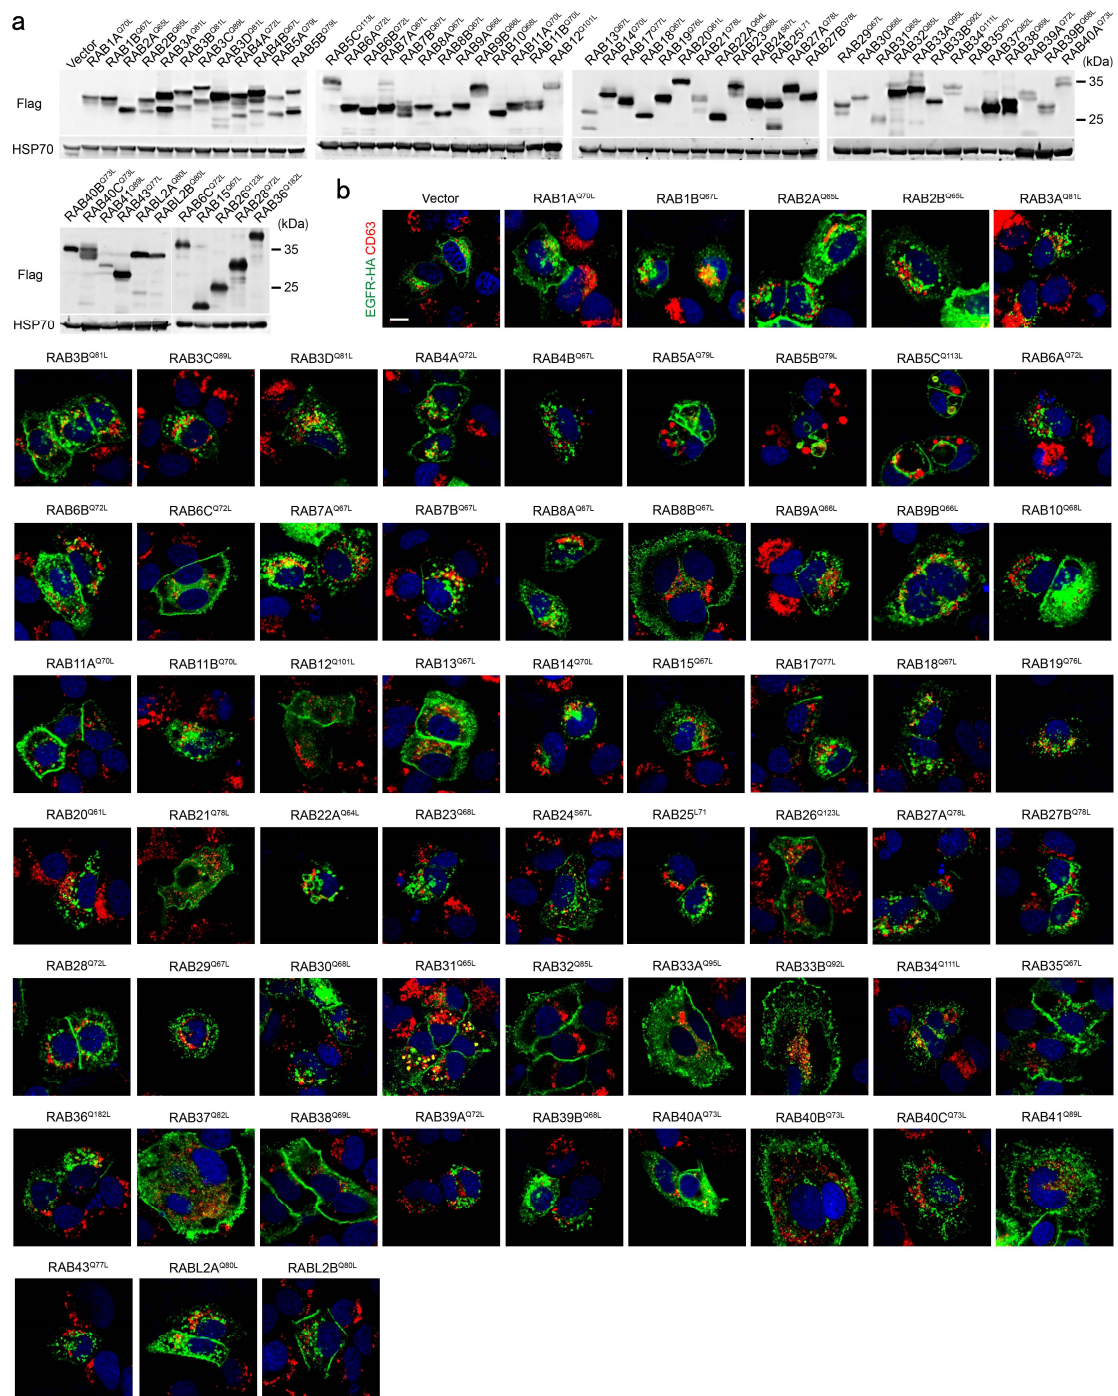

**Supplementary information, Fig. S1. RAB31<sup>Q65L</sup> specifically directs EGFR localization to CD63-positive MVEs. a** Western blotting analyses of whole-cell lysates from HeLa cells stably expressing the indicated constitutively active RAB GTPase. **b** Immunofluorescence of EGFR-HA (green) with CD63 (red) in the cells used in **(a)** transiently expressing EGFR-HA under normal condition. Scale bar, 10  $\mu\text{m}$ .
