# Supplementary material for: RAB31 marks and controls an ESCRT-independent exosome pathway
Source: PubMed Central journal article supplement (PMC8027411; doi:10.1038/s41422-020-00409-1), 2020-09-21
Supplement: 41422_2020_409_MOESM6_ESM.pdf [file 41422_2020_409_MOESM6_ESM.pdf]

# Supplementary information, Fig. S6

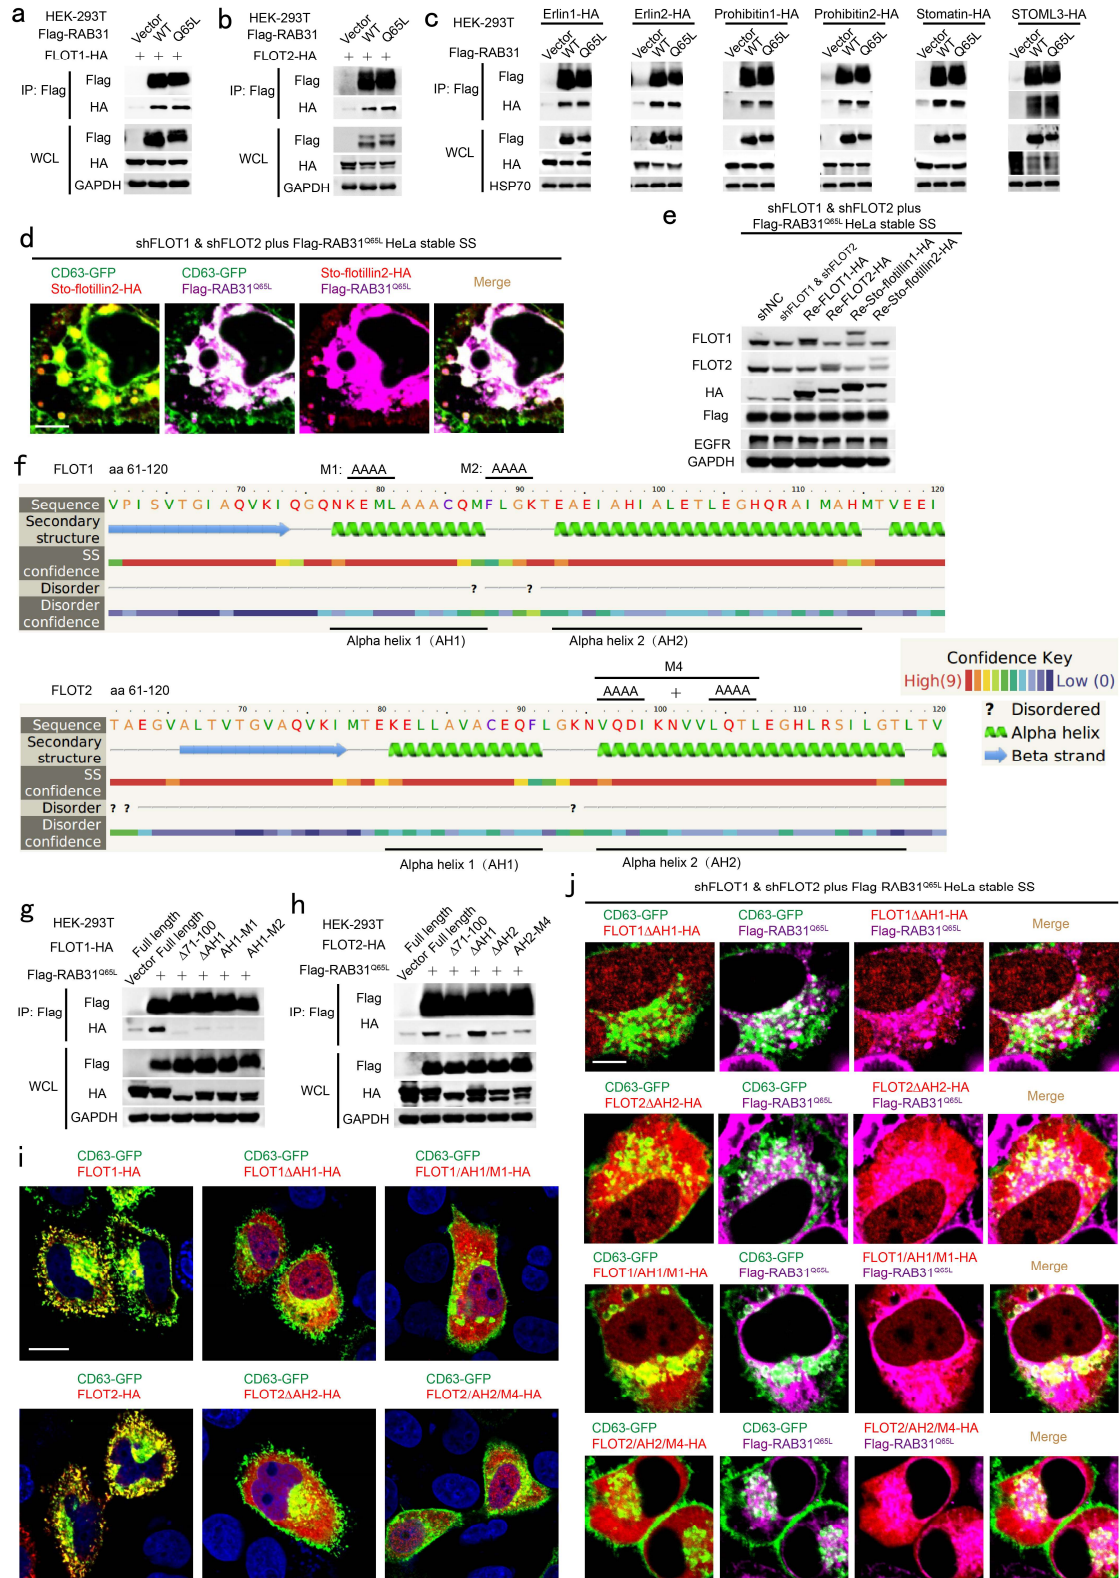

**Supplementary information, Fig. S6. Active RAB31 interacts with the SPFH domain of FLOTs and drives MVE membrane budding to form ILVs via the Flotillin domain of FLOTs.** **a-c** Western blotting analyses of whole-cell lysates (WCLs) and immunoprecipitates (IP) from HEK-293T cells co-expressing the indicated plasmids. **d** Immunofluorescence of Sto-flotillin2-HA (red) chimera and Flag-RAB31<sup>Q65L</sup> (magenta) with CD63-GFP (green) in the indicated stable HeLa cells transiently expressing Sto-flotillin2-HA and CD63-GFP under serum starvation (SS). **e** Western blotting analyses of WCL from the indicated stable HeLa cells stably re-introduced with the indicated plasmids under SS. **f** The amino acid sequences and their mutants (M1, M2, M4) of AH1 or AH2, as well as secondary structures of amino acids 61-120 of FLOT1 or FLOT2. **g, h** Western blotting analyses of WCL and IP from HEK-293T cells co-expressing the indicated plasmids. **i** Immunofluorescence of FLOT1, FLOT2, FLOT1 $\Delta$ AH1-HA, FLOT2 $\Delta$ AH2-HA, FLOT1/AH1/M1-HA or FLOT2/AH2/M4-HA (red) with CD63-GFP (green) in normal HeLa cells transiently expressing the indicated plasmids. **j** Immunofluorescence of FLOT1 $\Delta$ AH1-HA, FLOT2 $\Delta$ AH2-HA, FLOT1/AH1/M1-HA or FLOT2/AH2/M4-HA (red) and Flag-RAB31<sup>Q65L</sup> (magenta) with CD63-GFP (green) in the indicated stable HeLa cells transiently expressing the indicated plasmids under SS. Scale bars, 10  $\mu$ m.
